# Supplementary material for: Insight into the chemoselective aromaticvs.side-chain hydroxylation of alkylaromatics with H2O2catalyzed by a non-heme imine-based iron complex
Source: Royal Society of Chemistry journal article supplement (doi:10.1039/d0cy01868f), 2020-11-03
Supplement: d0cy01868f1.pdf [file d0cy01868f1.pdf]

# Insight into the Chemoselective Aromatic vs Side-chain Hydroxylation of Alkylaromatics with H<sub>2</sub>O<sub>2</sub> Catalyzed by a Non-Heme Imine Based Iron Complex

Barbara Ticconi,<sup>a</sup> Giorgio Capocasa,<sup>a</sup> Andrea Cerrato,<sup>a</sup> Stefano Di Stefano,<sup>a</sup> Andrea Lapi,<sup>a</sup> Beatrice Marincioni,<sup>a</sup> Giorgio Olivo<sup>b</sup> and Osvaldo Lanzalunga<sup>a,\*</sup>

<sup>a</sup>Dipartimento di Chimica and Istituto CNR per i Sistemi Biologici (ISB-CNR), Sezione Meccanismi di Reazione, Università degli Studi di Roma “La Sapienza”, P.le Aldo Moro 5, 00185 Rome, Italy

<sup>b</sup>Department Institut de Química Computacional i Catàlisi (IQCC) and Departament de Química, Universitat de Girona, Campus de Montilivi, 17071 Girona, Spain

\*Corresponding author, email: [osvaldo.lanzalunga@uniroma1.it](mailto:osvaldo.lanzalunga@uniroma1.it)

## Electronic Supplementary Information

### Contents

|                                                                                                                                                                           |    |
|---------------------------------------------------------------------------------------------------------------------------------------------------------------------------|----|
| Instruments and general methods .....                                                                                                                                     | 2  |
| GC traces for selected oxidations of alkylaromatics with H <sub>2</sub> O <sub>2</sub> catalyzed by the non heme imine based iron complex <b>1</b> .....                  | 4  |
| Oxidation of toluene.....                                                                                                                                                 | 4  |
| Oxidation of ethylbenzene .....                                                                                                                                           | 4  |
| Oxidation of diphenylmethane .....                                                                                                                                        | 5  |
| Oxidation of fluorene .....                                                                                                                                               | 5  |
| Oxidation of dihydroanthracene.....                                                                                                                                       | 6  |
| Oxidation of dihydroanthracene- <i>d4</i> .....                                                                                                                           | 6  |
| Oxidation of xanthene .....                                                                                                                                               | 7  |
| Oxidation of xanthene- <i>d2</i> .....                                                                                                                                    | 7  |
| <sup>1</sup> H NMR spectra for selected oxidations of alkylaromatics with H <sub>2</sub> O <sub>2</sub> catalyzed by the non heme imine based iron complex <b>1</b> ..... | 8  |
| Oxidation of DHA.....                                                                                                                                                     | 8  |
| Oxidation of DHA- <i>d4</i> .....                                                                                                                                         | 10 |
| Oxidation of xanthene .....                                                                                                                                               | 11 |
| Oxidation of xanthene- <i>d2</i> .....                                                                                                                                    | 13 |

## Instruments and general methods

NMR spectra were recorded on a Bruker300 spectrometer and were internally referenced to the proton solvent signal. GC analyses were carried out on a gas chromatograph equipped with a capillary methylsilicone column (30 m x 0.25 mm x 25  $\mu$ m) Chrompack CP-Sil 5 CB and a capillary nitroterephthalic acid modified polyethylene glycol column (30 m x 0.25 mm x 25  $\mu$ m) Zebron ZB-FFAP. GC-MS analyses were performed with a gas chromatograph equipped with a silica capillary column (30 m x 0.2 mm x 25  $\mu$ m) OV5 (95% methylsilicone, 5% phenylsilicone) coupled with a mass detector (EI, 70eV). Oxidation products were identified by comparison of their GC retention times, GC/MS and  $^1\text{H}$  NMR spectra with those of authentic specimens or by comparison of their spectral data with those reported in the literature. Oxidations were carried out by mixing  $\text{Fe}(\text{CF}_3\text{SO}_3)_2(\text{CH}_3\text{CN})_2$  (2.50  $\mu$ mol), picolylamine (5.0  $\mu$ mol) and picolylaldehyde (5.0  $\mu$ mol) in a vial at 25  $^\circ\text{C}$ . Substrate (250  $\mu$ mol) and  $\text{CH}_3\text{CN}$  were then added up to a total volume of 1 mL. A solution 1.74 M of  $\text{H}_2\text{O}_2$  in  $\text{CH}_3\text{CN}$  was then added over 30 minutes by syringe pump under vigorous stirring, and left reacting for additional 1 hour. In the oxidation of xanthene-*d*<sub>2</sub>, silylation of hydroxylated products was required for their quantitative analysis. Reaction crude was placed in a round bottom flask and diluted with 200  $\mu\text{L}$  of toluene. *N,O*-Bis(trimethylsilyl)trifluoroacetamide (BSTFA) (1 equiv.) was added to the solution and the mixture was heated at 60 $^\circ\text{C}$  for 2 h.

After addition of an internal standard, reaction mixtures were filtered over a short pad of  $\text{SiO}_2$  with 10 mL of AcOEt and analyzed by GC, GC-MS and  $^1\text{H}$  NMR.

Oxidation products were identified by comparison with authentic specimens or by comparison of their spectral data with those reported in the literature.

1-Hydroxydihydroanthracene, 2-hydroxydihydroanthracene, were isolated by column chromatography from the crude reaction mixture of dihydroanthracene oxidation carried out

under the same reaction conditions reported above using 25  $\mu\text{mol}$  of  $\text{Fe}(\text{CF}_3\text{SO}_3)_2(\text{CH}_3\text{CN})_2$ , 50  $\mu\text{mol}$  of picolylamine and picolylaldehyde, 2.5 mmol of dihydroanthracene and 0.5 mmol of  $\text{H}_2\text{O}_2$  in 10 mL of  $\text{CH}_3\text{CN}$ . Products were characterized as follows:

1-hydroxy-9,10-dihydroanthracene:

$^1\text{H-NMR}$  (300 MHz,  $\text{CDCl}_3$ )  $\delta$ : 7.34-7.18 (*m*, 2H), 7.09-7.04 (*t*,  $J = 7.6$  Hz, 2H), 6.91- 6.89 (*d*,  $J = 7.6$  Hz, 2H), 6.88-6.86 (*d*,  $J = 7.6$  Hz, 2H), 4.86 (*br s*, 1H), 3.96 (*s*, 4H).  $^{13}\text{C-NMR}$  (75 MHz,  $\text{CDCl}_3$ )  $\delta$ : 138.3, 136.0, 135.5, 128.8, 127.8, 127.4, 126.6, 126.1, 126.0, 120.1, 112.4, 35.6, 28.5. GC-MS  $m/z$  (rel. intensity):  $\text{M}^+$  196 (100), 195 (86), 194 (17), 181 (11), 179 (20), 178 (16), 177 (18), 167 (29), 166 (14), 165 (42), 152 (14). HRMS (ESI $^+$ ,  $m/z$ ): calcd for  $(\text{C}_{14}\text{H}_{13}\text{O})^+$  ( $\text{M}+\text{H})^+$ : 197.0966; found 197.0972.

2-hydroxy-9,10-dihydroanthracene:

$^1\text{H-NMR}$  (300 MHz,  $\text{CDCl}_3$ )  $\delta$ : 7.29-7.27 (*m*, 2H), 7.23-7.19 (*m*, 2H), 7.15 (*d*,  $J = 8.1$  Hz, 2H), 6.80 (*d*,  $J = 2.5$  Hz, 2H), 6.68 (*dd*,  $J = 8.1, 2.5$  Hz, 2H), 4.86 (*br s*, 1H), 3.89 (*s*, 4H).  $^{13}\text{C-NMR}$  (75 MHz,  $\text{CDCl}_3$ )  $\delta$ : 153.7, 138.1, 136.9, 136.2, 128.8, 128.3, 127.3, 126.0, 125.9, 114.1, 112.9, 36.1, 35.1. GC-MS  $m/z$  (rel. intensity):  $\text{M}^+$  196 (100), 195 (70), 194 (17), 181 (14), 179 (39), 178 (19), 177 (17), 167 (23), 166 (13), 165 (44), 152 (17). HRMS (ESI $^+$ ,  $m/z$ ): calcd for  $(\text{C}_{14}\text{H}_{13}\text{O})^+$  ( $\text{M}+\text{H})^+$ : 197.0966; found 197.0977.

# GC traces for selected oxidations of alkylaromatics with H<sub>2</sub>O<sub>2</sub> catalyzed by the non-heme imine based iron complex **1**

## *Oxidation of toluene*

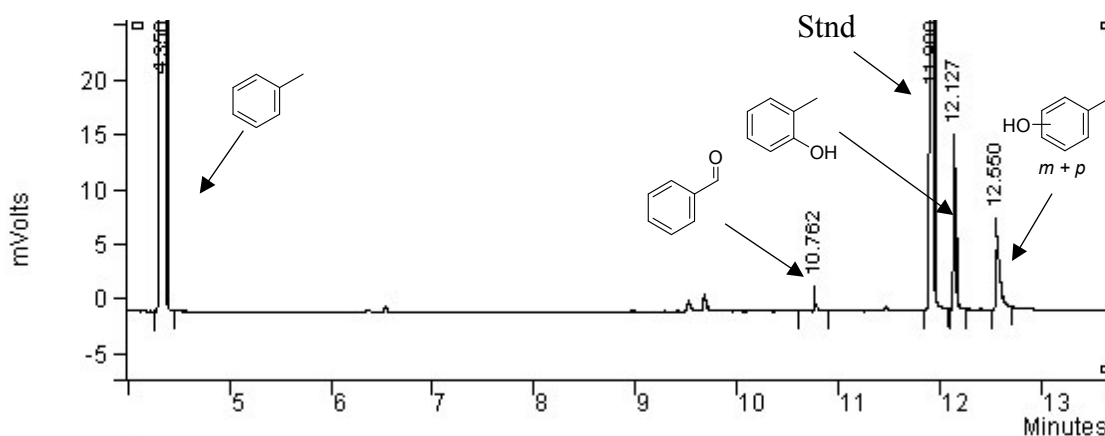

Figure S1: GC trace for toluene oxidation

## *Oxidation of ethylbenzene*

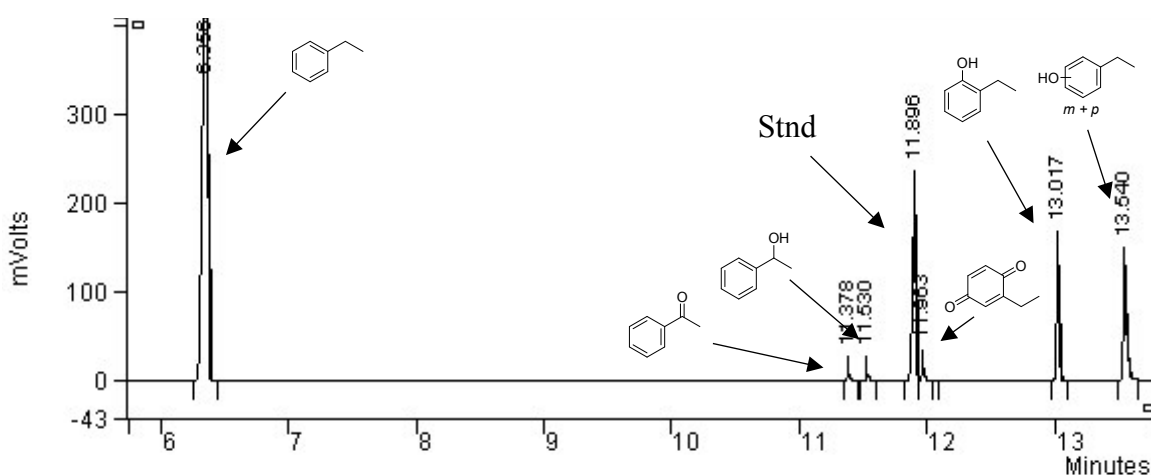

Figure S2: GC trace for ethylbenzene oxidation

## Oxidation of diphenylmethane

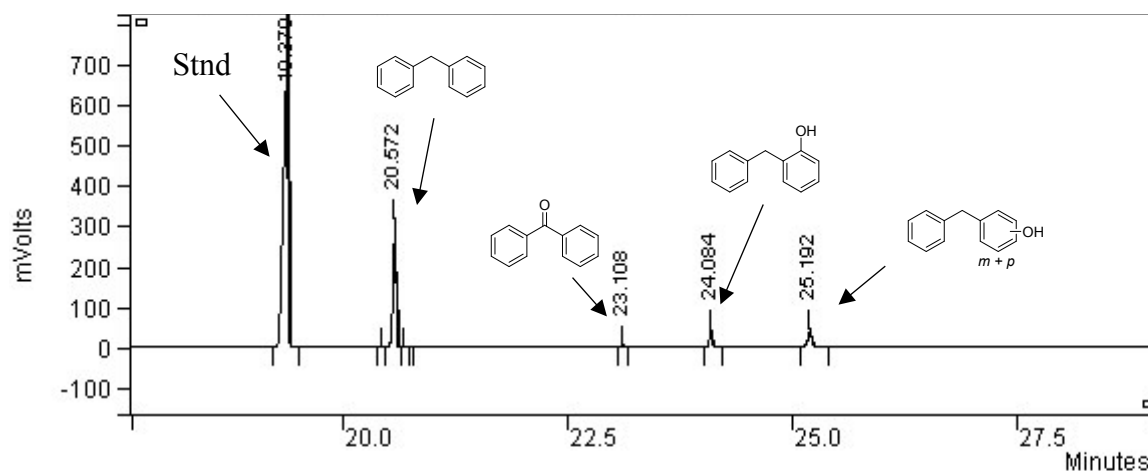

Figure S3: GC trace for diphenylmethane oxidation

## Oxidation of fluorene

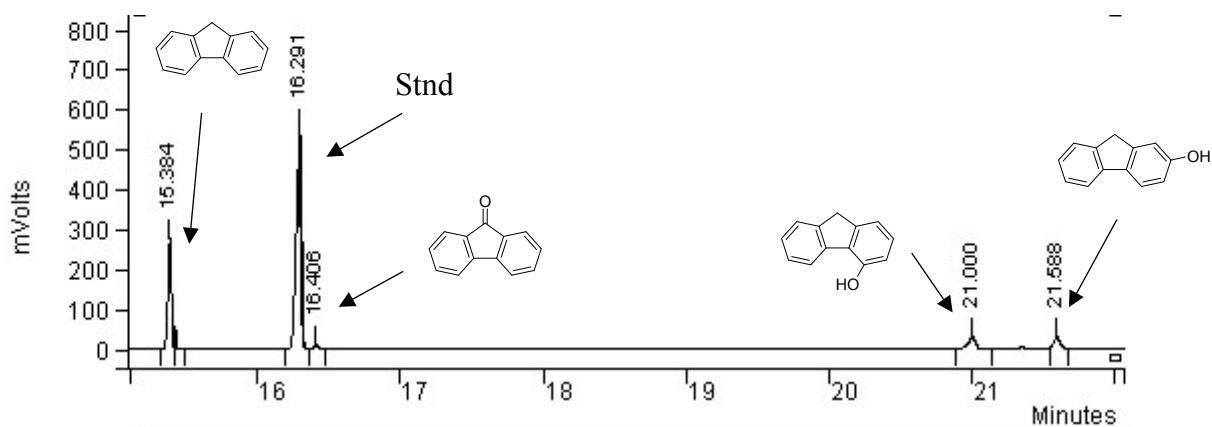

Figure S4: GC trace for fluorene oxidation

## Oxidation of dihydroanthracene

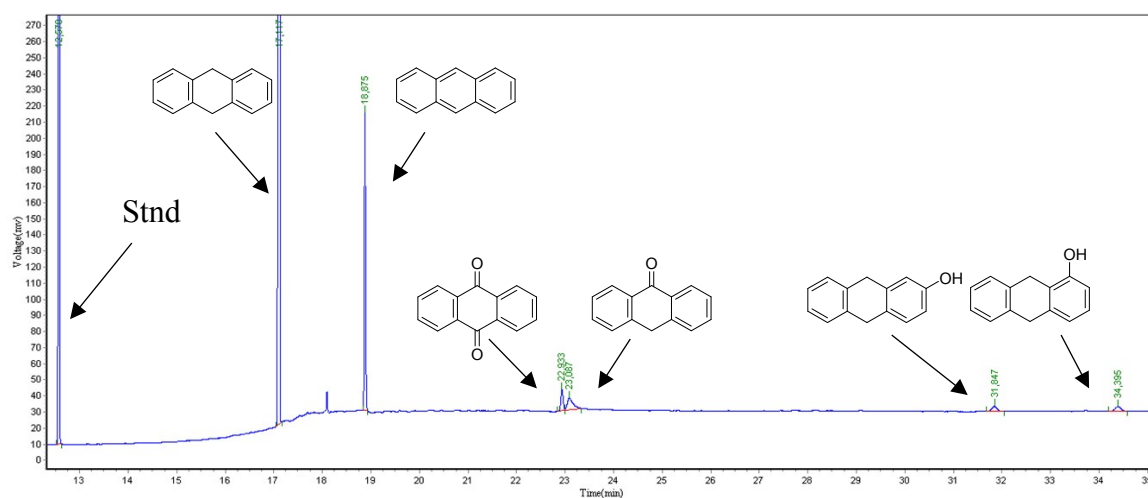

Figure S5: GC trace for dihydroanthracene oxidation

## Oxidation of dihydroanthracene-*d*4

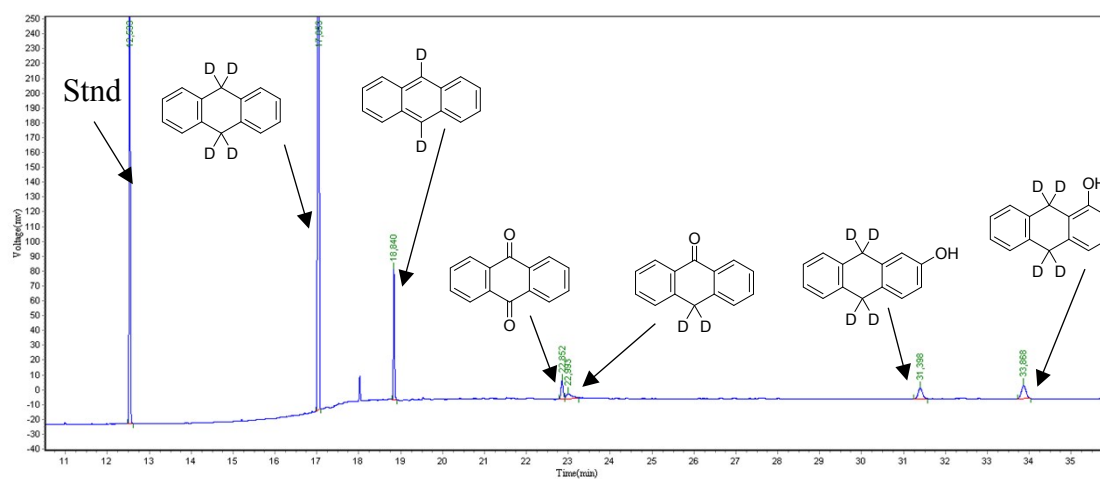

Figure S6: GC trace for dihydroanthracene-*d*4 oxidation

### Oxidation of xanthene

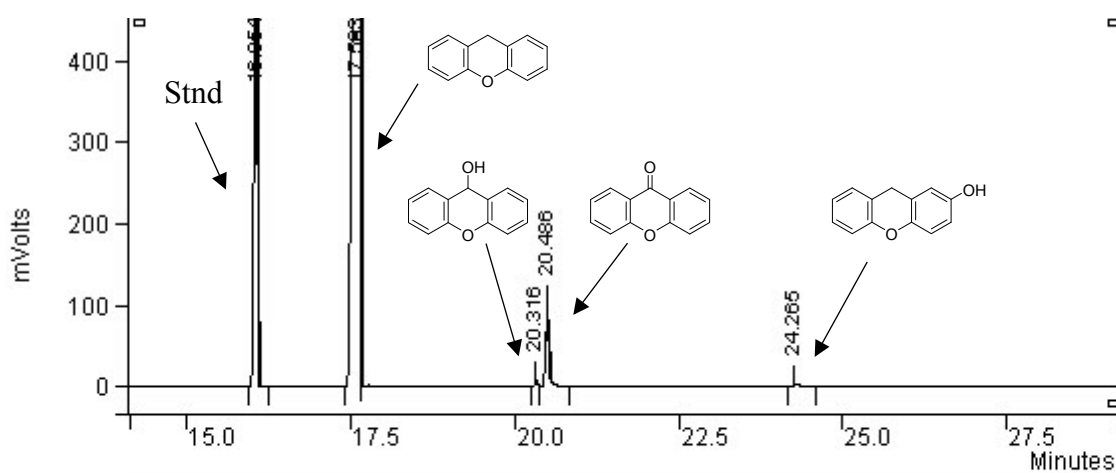

Figure S7: GC trace for xanthene oxidation

### Oxidation of xanthene-d2

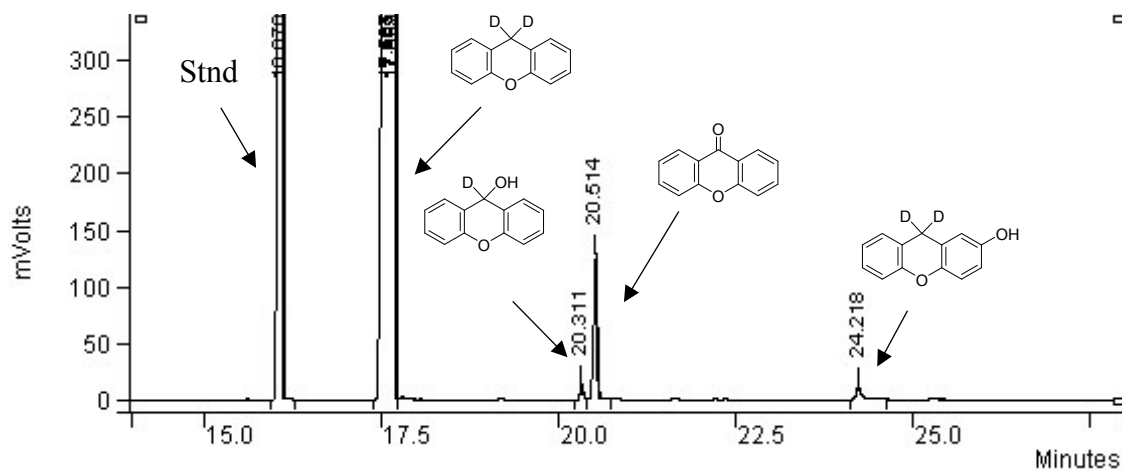

Figure S8: GC trace for xanthene-d2 oxidation

$^1\text{H}$  NMR spectra for selected oxidations of alkylaromatics with  $\text{H}_2\text{O}_2$  catalyzed by the non-heme imine based iron complex **1**

*Oxidation of dihydroanthracene (DHA)*

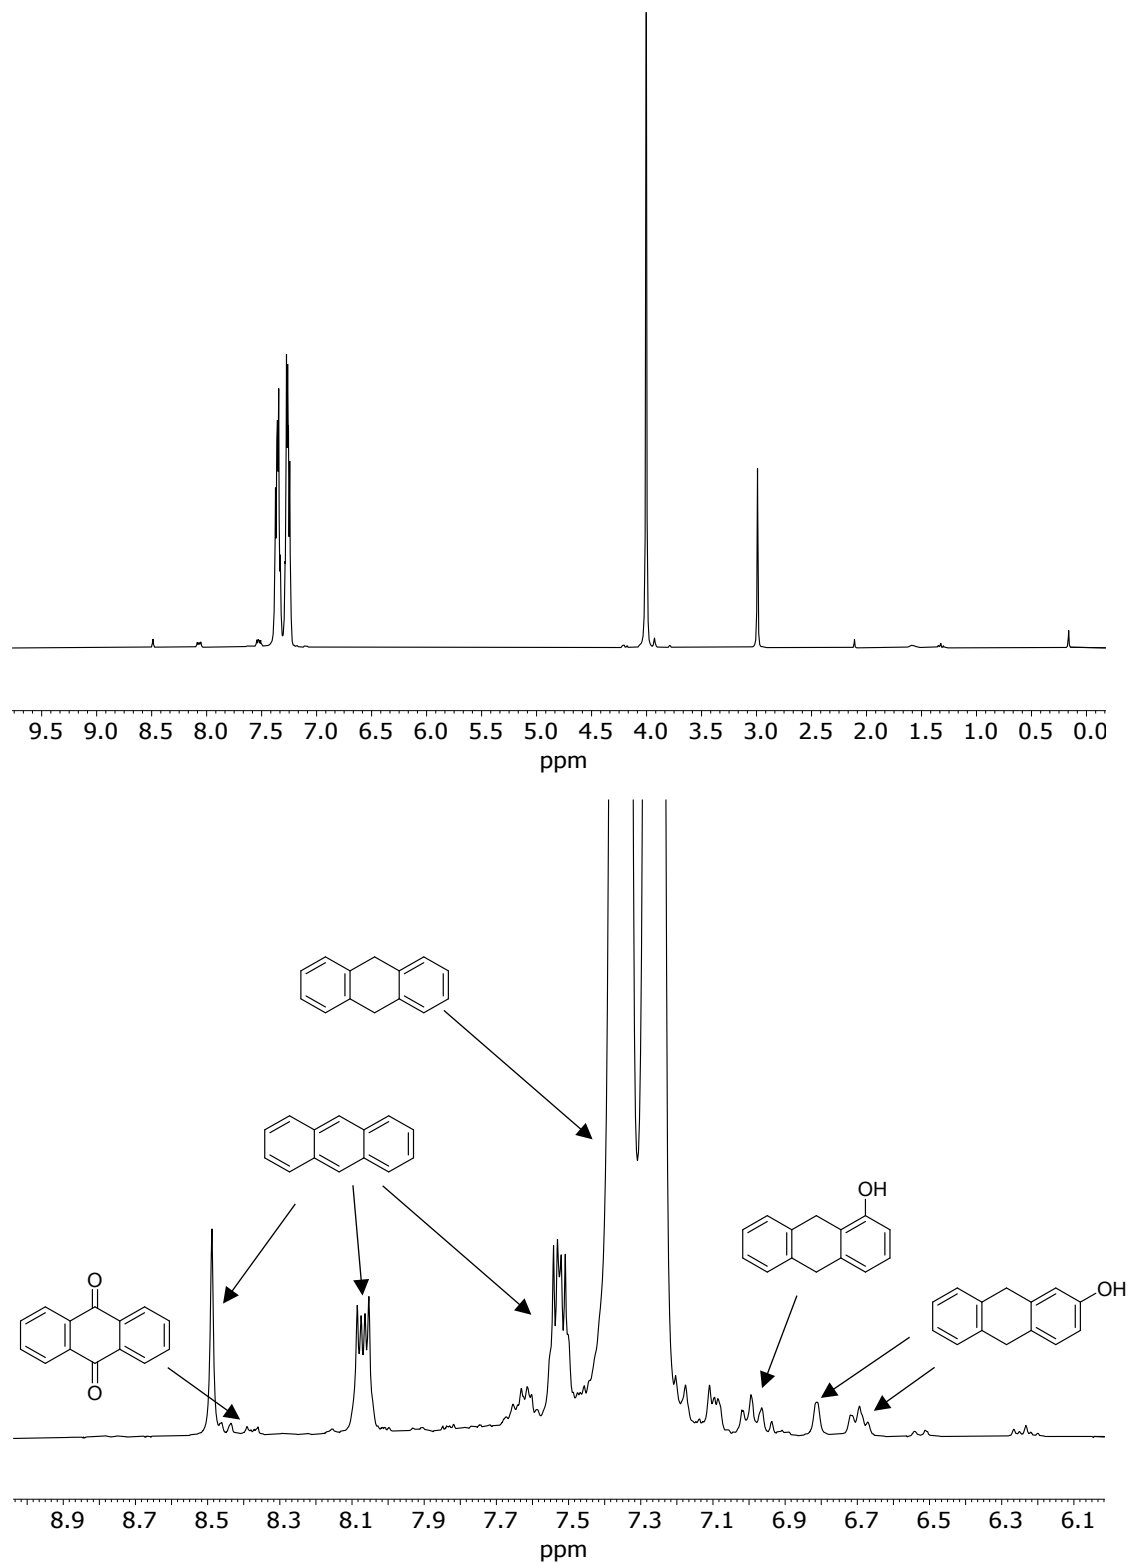

Figure S9:  $^1\text{H}$ -NMR spectrum for DHA oxidation



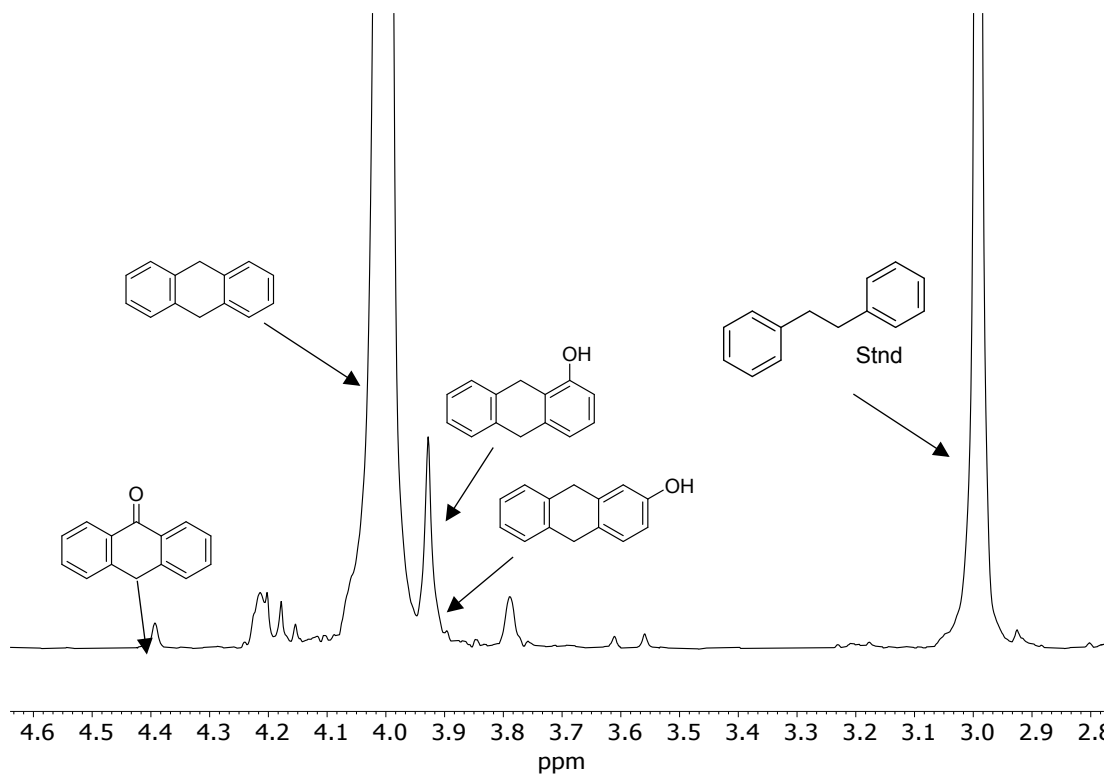

Figure S9: <sup>1</sup>H-NMR spectrum for DHA oxidation (continue)

Oxidation of dihydroanthracene-*d*4 (DHA-*d*4)

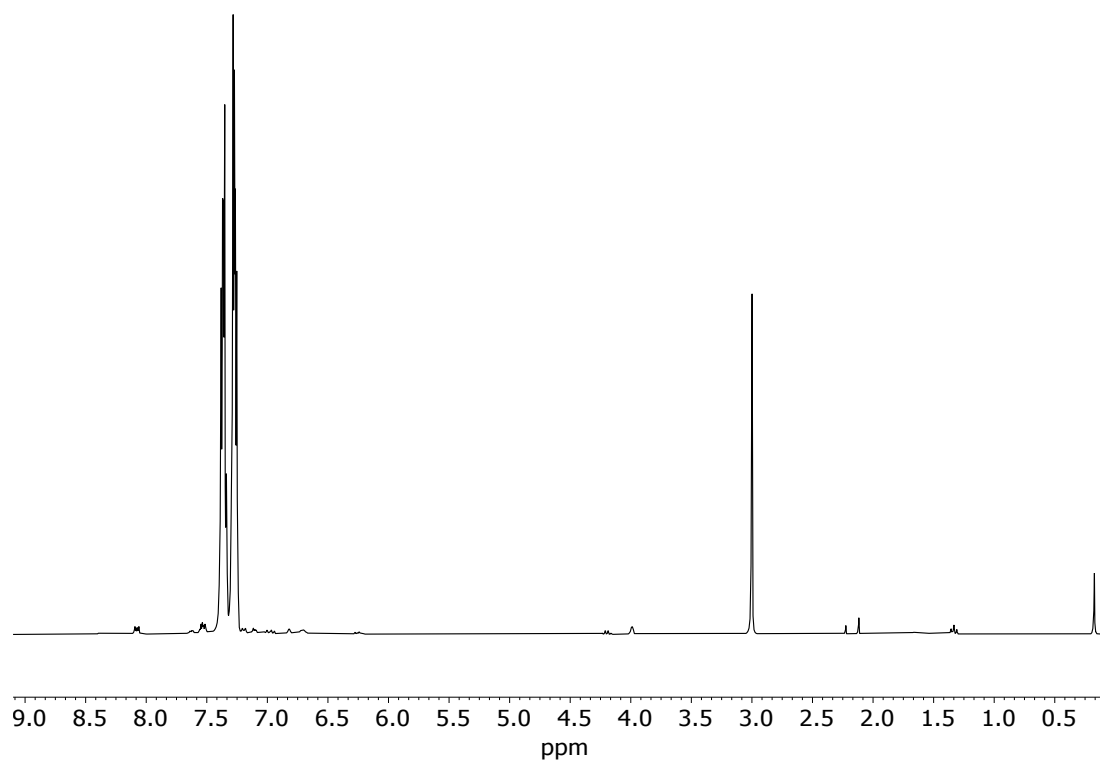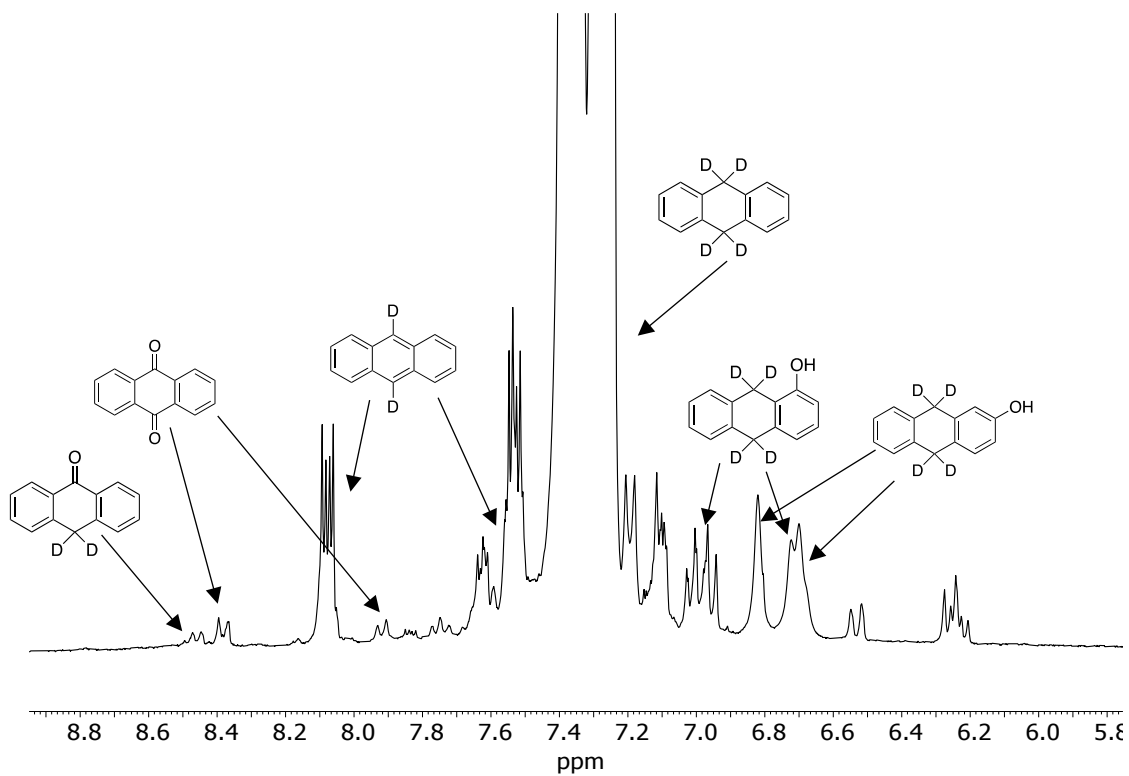

Figure S10: <sup>1</sup>H-NMR spectrum for DHA-*d*4 oxidation.

*Oxidation of xanthene*

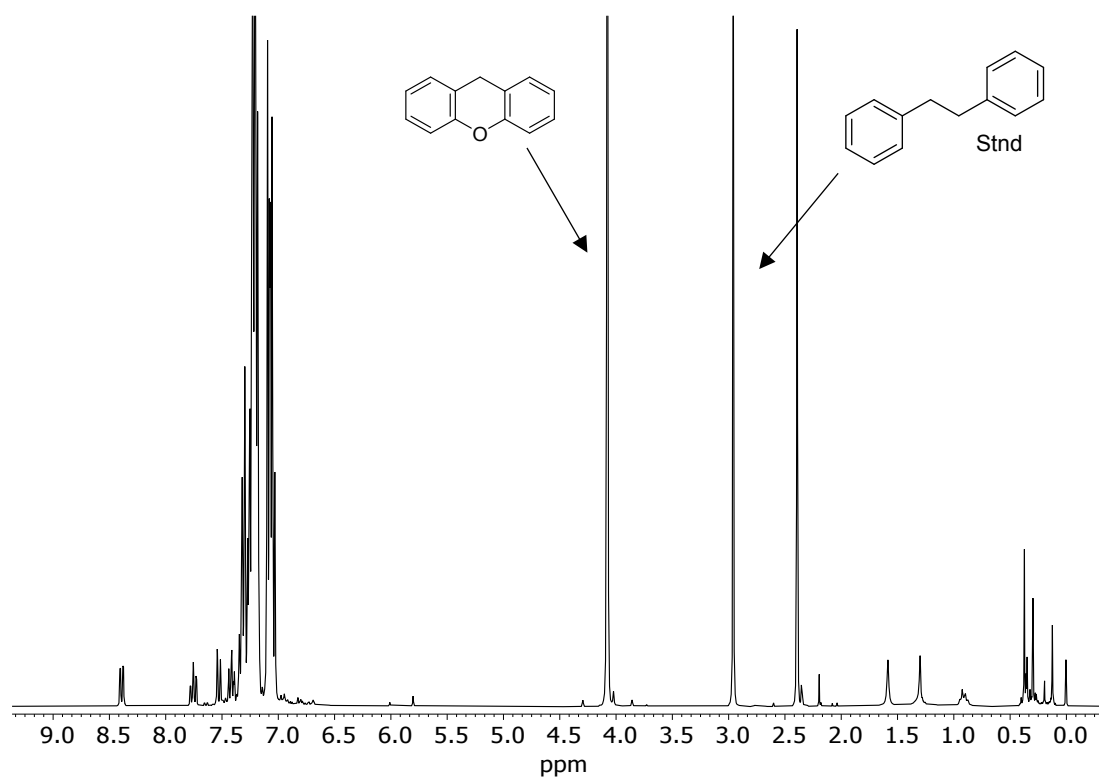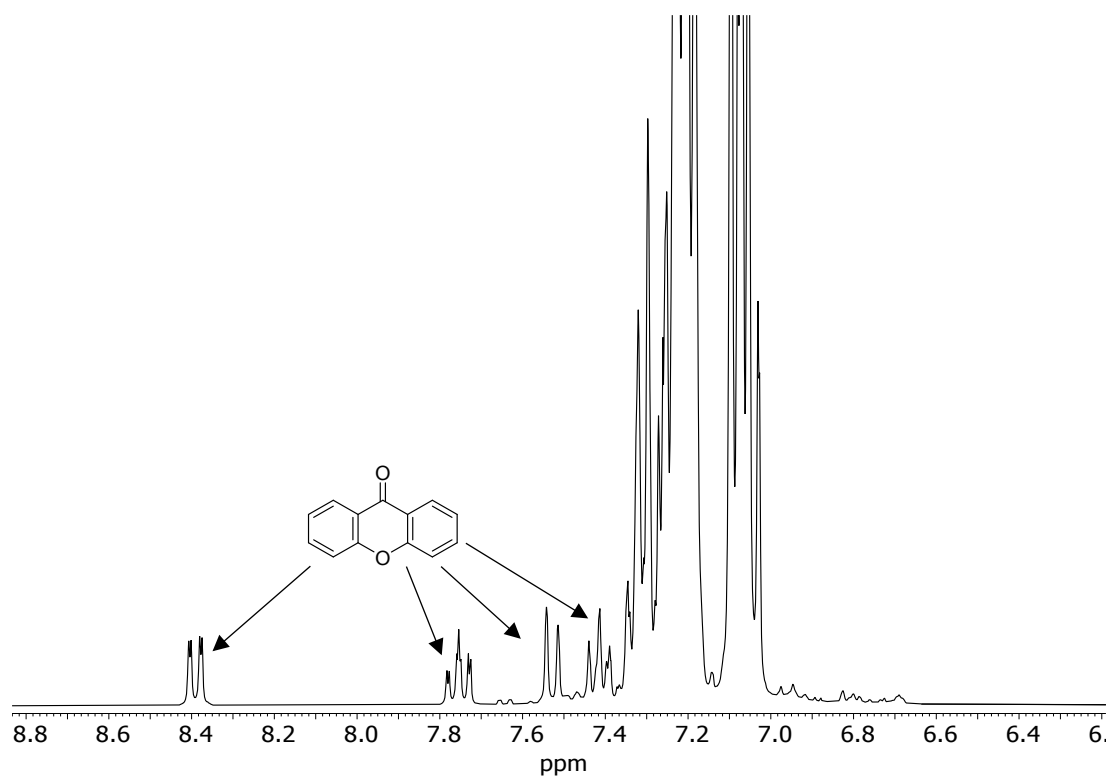

Figure S11: <sup>1</sup>H-NMR spectrum for xanthene oxidation after derivatization with BSTFA.

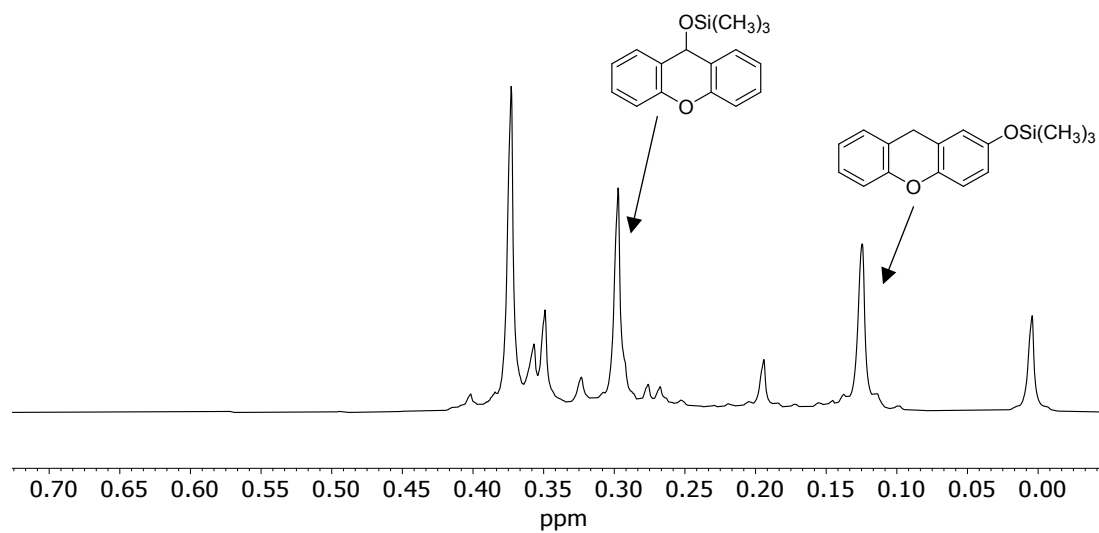

Figure S11: <sup>1</sup>H-NMR spectrum for xanthene oxidation after derivatization with BSTFA.  
(continue)

*Oxidation of xanthene-d2*

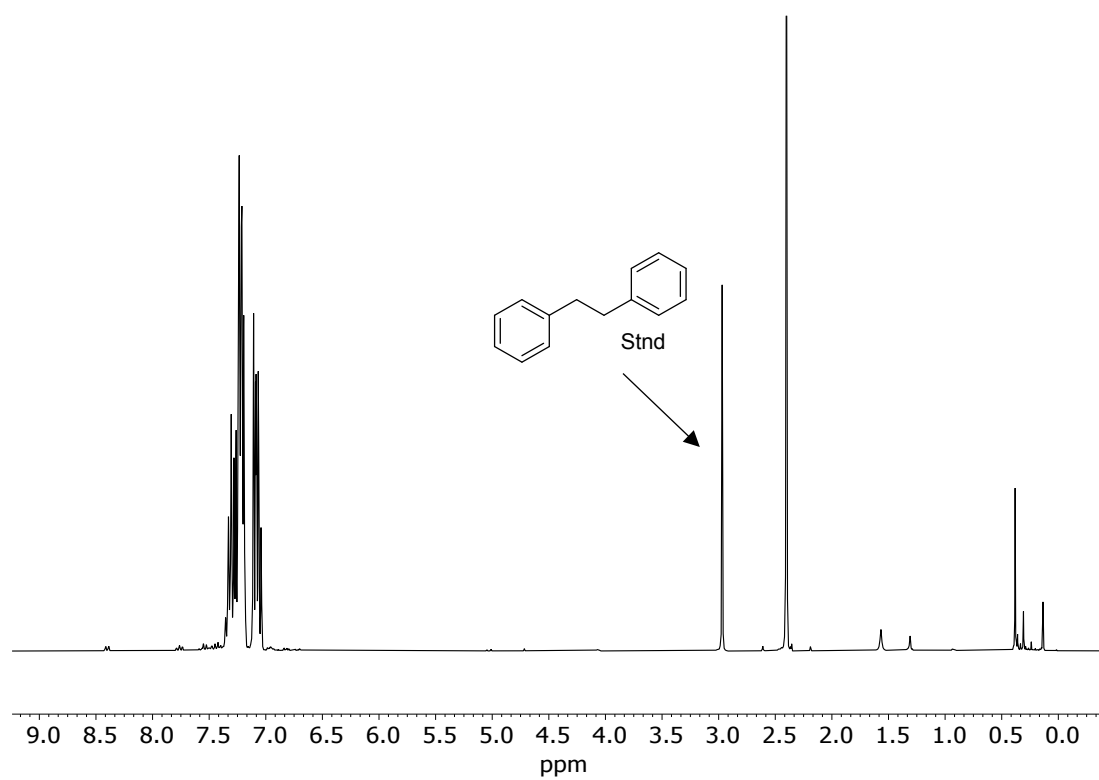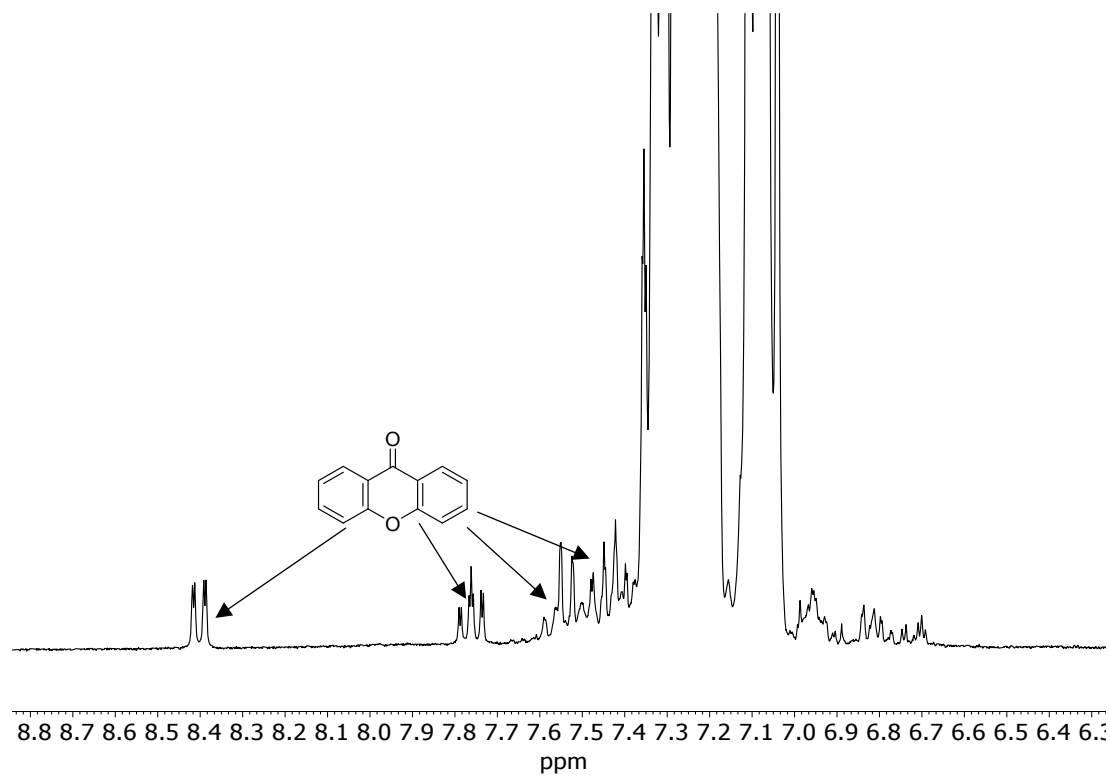

Figure S12:  $^1\text{H-NMR}$  spectrum for xanthene- $d_2$  oxidation after derivatization with BSTFA.

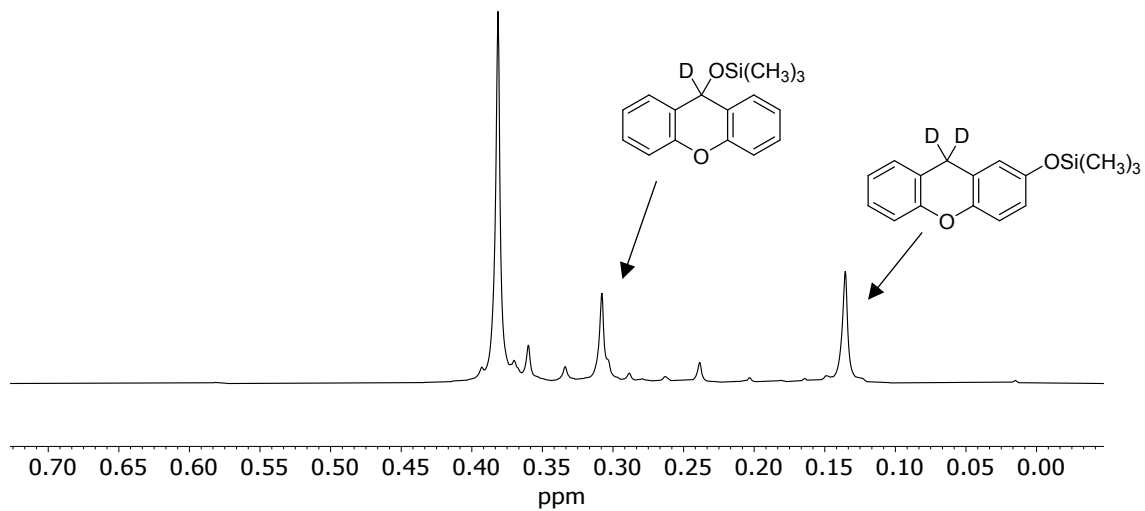

Figure S12:  $^1\text{H-NMR}$  spectrum for xanthene-*d*2 oxidation after derivatization with BSTFA.  
(continue).
